# Supplementary material for: ZNF185 is a p53 target gene following DNA damage
Source: Aging (Albany NY). 2018 Nov 16;10(11):3308–26. doi: 10.18632/aging.101639 (PMC6286825; doi:10.18632/aging.101639)
Supplement: Supplementary Table 1 [file aging-10-101639-s001.xlsx]

## Sheet: Foglio1
List of siRNAs and primers sequences
siRNAs
Name	Company		Cat. No.
Neg CTRL	Dharmacon		D-001810-10
hZNF185 #1	Qiagen		SI04156320
hZNF185 #2	Qiagen		SI04309137
hTP53	Qiagen		SI00011655
Primers for qPCR
TBP-For	TCAAACCCAGAATTGTTCTCCTTAT
TBP-Rev	CCTGAATCCCTTTAGAATAGGGTAG
ZNF185-For	TCAAGCAGATGAAAGTGCGAACC
ZNF185-Rev	CTCCCCAGCTGATGAAAAGGATG
CDKN1A-For	GTCACTGTCTTGTACCCTTGTG
CDKN1A-Rev	CGGCGTTTGGAGTGGTAGAAA
Primers for ChIP
ZNF185-p53bs-For	TACTGCTGAGAGAAAGTGGAGG
ZNF185-p53bs-Rev	CCAGGGCACCTCTAGTCACC
CDKN1A-p53bs-For	GCTCCCTCATGGGCAAACTCACT
CDKN1A-p53bs-Rev	TGGCTGGTCTACCTGGCTCCTCT
Primers for luciferase activity assay
ZNF185-promoter-For	GTACTCGAGTGCTGCCTAAGCTGGAG
ZNF185-promoter-Rev	GTAAAGCTTGGGCCTCAAGCTCTTC
Primers for mutagenesis
ZNF185-bsMUT-For	CTATCTGGGTAAATATCATTTGGGAATATCTGGTGCTTGAAG
ZNF185-bsMUT-Rev	CTTCAAGCACCAGATATTCCCAAATGATATTTACCCAGATAG
